# Supplementary material for: Copper(i) halide polymers derived from tris[2-(pyridin-2-yl)ethyl]phosphine: halogen-tunable colorful luminescence spanning from deep blue to green
Source: Royal Society of Chemistry journal article supplement (doi:10.1039/d0nj00894j), 2020-01-01
Supplement: d0nj00894j1.pdf [file d0nj00894j1.pdf]

## Supporting Information

### **Copper(I) halide polymers derived from tris[2-(pyridin-2-yl)ethyl]phosphine: halogen-tunable colorful luminescence spanning from deep blue to green**

Alexander V. Artem'ev,<sup>\*a</sup> Andrey Yu. Baranov,<sup>a</sup> Mariana I. Rakhmanova,<sup>a</sup> Svetlana F. Malysheva,<sup>b</sup> Denis G. Samsonenko<sup>a</sup>

<sup>a</sup> *Nikolaev Institute of Inorganic Chemistry, 3, Acad. Lavrentiev Ave., Novosibirsk 630090, Russian Federation*

<sup>b</sup> *A. E. Favorsky Irkutsk Institute of Chemistry, Siberian Branch of Russian Academy of Sciences, Russian Federation*

\*Author for correspondence: [chemisufarm@yandex.ru](mailto:chemisufarm@yandex.ru) (Alexander V. Artem'ev)

#### **Table of Contents**

##### Pages

|      |                                |
|------|--------------------------------|
| S2–3 | §1. X-Ray crystallography      |
| S3-4 | §2. FT-IR spectra              |
| S4–6 | §3. Computational details      |
| S6–7 | §7. Photophysical measurements |

## §1. X-Ray crystallography

Single crystals of **3**·0.5CH<sub>3</sub>CN were grown by vapor diffusion of diethyl ether into an acetonitrile solution at room temperature. Diffraction data were obtained on an automated Agilent Xcalibur diffractometer equipped with an area AtlasS2 detector (graphite monochromator,  $\lambda(\text{MoK}\alpha) = 0.71073 \text{ \AA}$ ,  $\omega$ -scans). Integration, absorption correction, and determination of unit cell parameters were performed using the CrysAlisPro program package.<sup>[1]</sup> The structures were solved by dual space algorithm (SHELXT<sup>[2]</sup>) and refined by the full-matrix least squares technique (SHELXL<sup>[3]</sup>) in the anisotropic approximation (except hydrogen atoms). Positions of hydrogen atoms were calculated geometrically and refined in the riding model.

The crystallographic data and details of the structure refinements are summarized in Table S1. CCDC 1982609 contains the supplementary crystallographic data for this paper. These data can be obtained free of charge from The Cambridge Crystallographic Data Center at [http://www.ccdc.cam.ac.uk/data\\_request/cif](http://www.ccdc.cam.ac.uk/data_request/cif).

**Table S1.** Crystal data and structure refinement for **3**·0.5CH<sub>3</sub>CN.

|                                                                            |                                                                                     |
|----------------------------------------------------------------------------|-------------------------------------------------------------------------------------|
| CCDC number                                                                | 1982609                                                                             |
| Chemical formula                                                           | C <sub>22</sub> H <sub>25.5</sub> Cu <sub>2</sub> I <sub>2</sub> N <sub>3.5</sub> P |
| $M_r$                                                                      | 750.81                                                                              |
| Crystal system, space group                                                | Triclinic, $P\bar{1}$                                                               |
| Temperature (K)                                                            | 130                                                                                 |
| $a, b, c$ (Å)                                                              | 9.4902(3), 12.2629(5), 12.5114(5)                                                   |
| $\alpha, \beta, \gamma$ (°)                                                | 113.970(4), 102.843(3), 97.774(3)                                                   |
| $V$ (Å <sup>3</sup> )                                                      | 1254.92(9)                                                                          |
| $Z$                                                                        | 2                                                                                   |
| $\mu$ (mm <sup>-1</sup> )                                                  | 4.23                                                                                |
| Crystal size (mm)                                                          | 0.25 × 0.10 × 0.04                                                                  |
| $T_{\min}, T_{\max}$                                                       | 0.748, 1.000                                                                        |
| No. of measured, independent and observed [ $I > 2\sigma(I)$ ] reflections | 12408, 6409, 5532                                                                   |
| $R_{\text{int}}$                                                           | 0.023                                                                               |
| $(\sin \theta/\lambda)_{\text{max}}$ (Å <sup>-1</sup> )                    | 0.711                                                                               |
| $R[F^2 > 2s(F^2)], wR(F^2), S$                                             | 0.025, 0.053, 1.01                                                                  |
| No. of reflections                                                         | 6409                                                                                |
| No. of parameters                                                          | 290                                                                                 |
| $\Delta\rho_{\text{max}}, \Delta\rho_{\text{min}}$ (e Å <sup>-3</sup> )    | 0.65, -0.58                                                                         |

<sup>[1]</sup> CrysAlisPro 1.171.38.46, Rigaku Oxford Diffraction, 2015.

<sup>[2]</sup> G. M. Sheldrick *Acta Crystallogr.*, **2015**, *A71*, 3–8.

<sup>[3]</sup> G. M. Sheldrick, *Acta Crystallogr.*, **2015**, *C71*, 3–8.

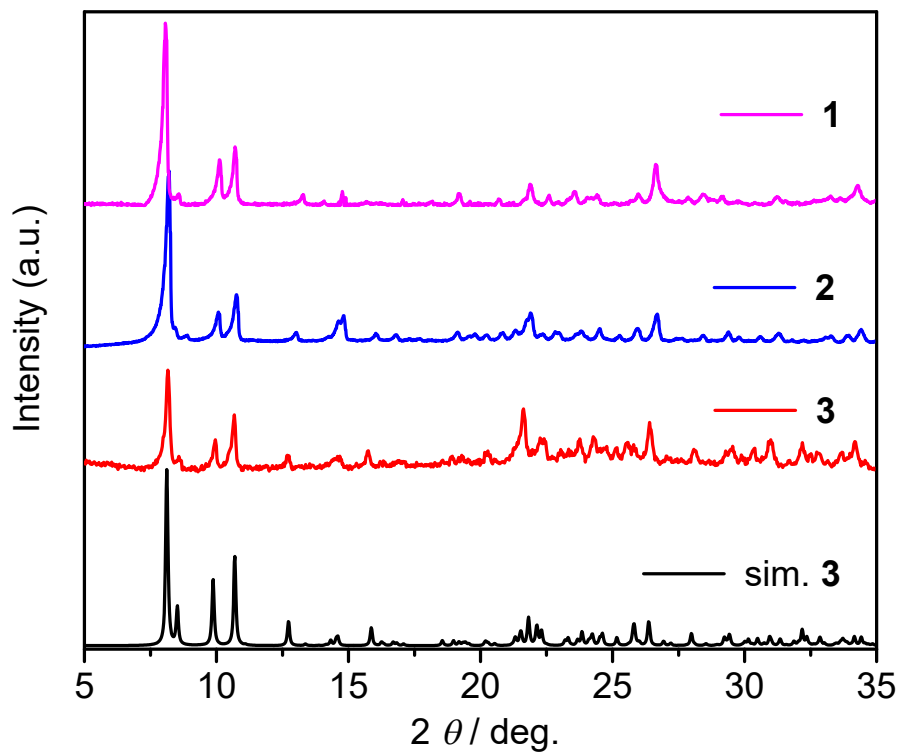

**Figure S1.** Experimental XRPD patterns for 1–3 compared with the simulated one for 3·0.5CH<sub>3</sub>CN.

## §2. FT-IR spectra

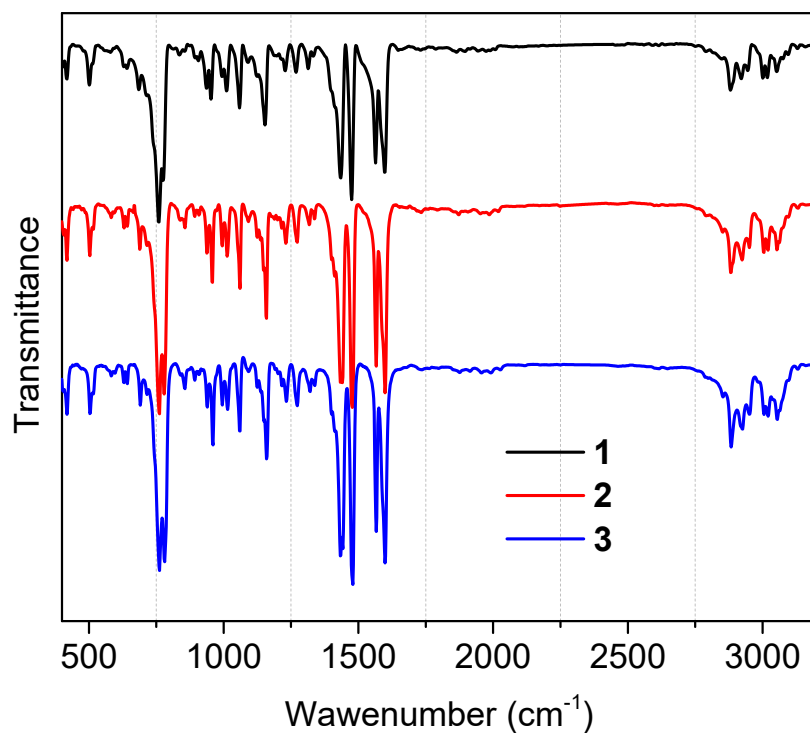

**Figure S2.** FT-IR spectra of 1–3 showed in the 400–3200 cm<sup>-1</sup> region.

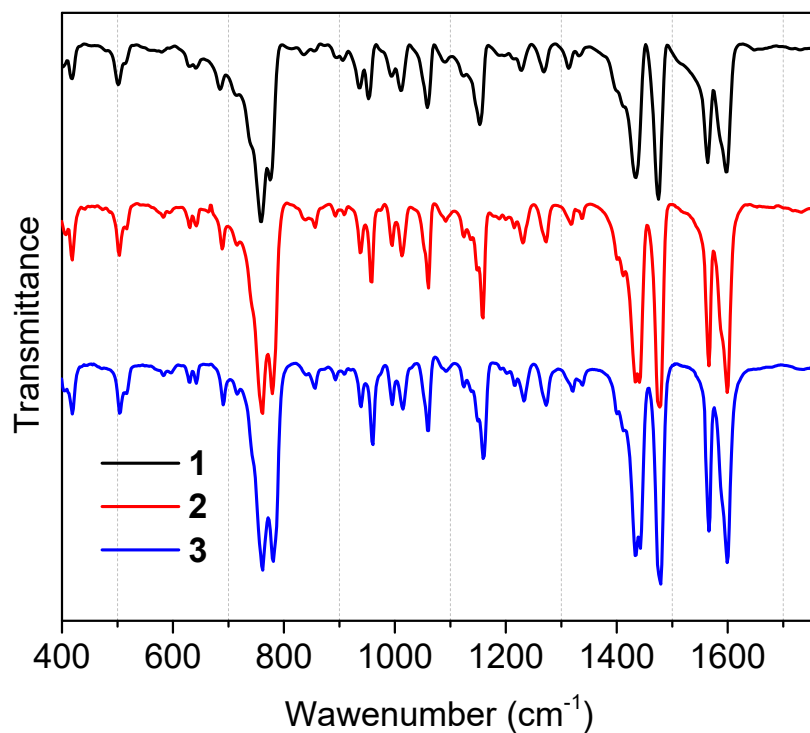

**Figure S3.** FT-IR spectra of **1–3** showed in the fingerprint region.

### §3. Computational details

**Figure S4.** Five lowest unoccupied and 12 highest occupied MOs (iso-value = 0.04) for the  $S_0$  state of the model  $\{\text{Cu}_4\text{I}_4\text{L}_2\}$  fragment of CP **3** calculated at the B3LYP/LANL2DZ/6-31+G(d,p) level.

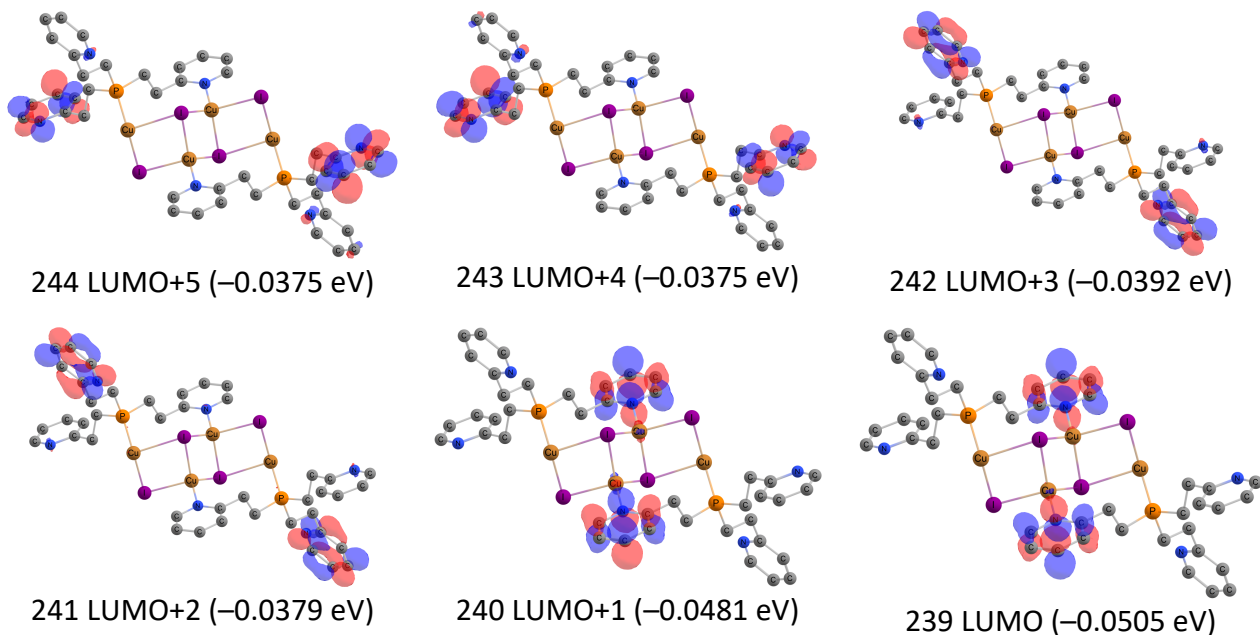

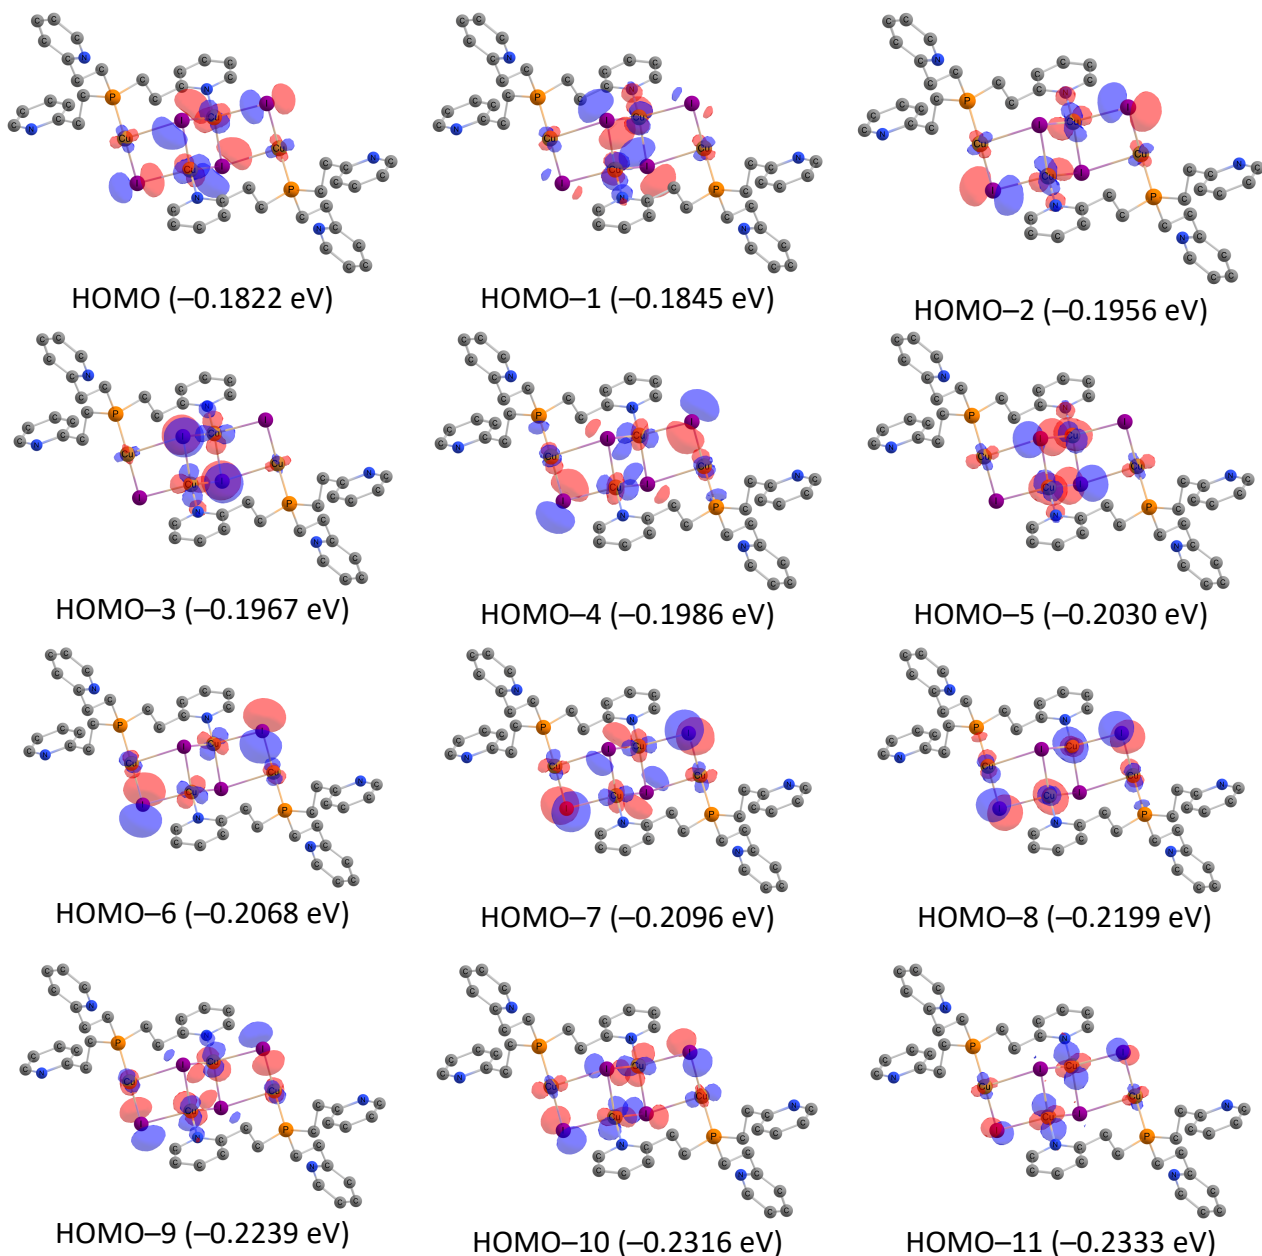

**Table S2.** The main singlet-singlet electronic transitions ( $f > 0.004$ ) in the absorption spectrum of **3** derived from TD-DFT calculations of the model  $\{\text{Cu}_4\text{I}_4\text{L}_2\}$  fragment at B3LYP/LANL2DZ/6-31+G(d,p) level ( $S_0$  state, gas).

| E, eV | $\lambda$ , nm | $f^{(a)}$ | Transitions (main contributions)                                       | Character $^{(b)}$  |
|-------|----------------|-----------|------------------------------------------------------------------------|---------------------|
| 2.94  | 421.0          | 0.0159    | HOMO-1 $\rightarrow$ LUMO (19.8%)<br>HOMO $\rightarrow$ LUMO (75.7%)   | (M+X)LCT            |
| 2.98  | 415.6          | 0.0108    | HOMO-1 $\rightarrow$ LUMO (68.7%)<br>HOMO $\rightarrow$ LUMO (20.6%)   | (M+X)LCT            |
| 3.27  | 379.0          | 0.0080    | HOMO-1 $\rightarrow$ LUMO (59.4%)<br>HOMO-2 $\rightarrow$ LUMO (20.8%) | (M+X)LCT            |
| 3.32  | 373.7          | 0.0420    | HOMO $\rightarrow$ LUMO+2 (36.2%)<br>HOMO $\rightarrow$ LUMO+7 (25.8%) | (M+X)LCT + (M+I)MCT |

|      |       |        |                                                                                                      |                     |
|------|-------|--------|------------------------------------------------------------------------------------------------------|---------------------|
| 3.38 | 366.5 | 0.0239 | HOMO-1 → LUMO (11.7%)<br>HOMO-1 → LUMO+2 (33.3%)<br>HOMO-1 → LUMO+7 (22.4%)<br>HOMO → LUMO+2 (14.7%) | (M+X)LCT + (M+I)MCT |
| 3.44 | 360.5 | 0.0093 | HOMO-3 → LUMO (16.9%)<br>HOMO-2 → LUMO+1 (56.4%)                                                     | (M+X)LCT            |
| 3.48 | 356.3 | 0.0080 | HOMO-6 → LUMO (14.5%)<br>HOMO-4 → LUMO+1 (74.7%)                                                     | (M+X)LCT            |
| 3.57 | 346.8 | 0.0133 | HOMO-5 → LUMO+1 (74.8%)                                                                              | (M+X)LCT            |
| 3.65 | 339.9 | 0.0089 | HOMO-6 → LUMO (23.5%)<br>HOMO-1 → LUMO+2 (14.2%)<br>HOMO → LUMO+9 (16.2%)                            | (M+X)LCT            |
| 3.72 | 333.2 | 0.0449 | HOMO-3 → LUMO+2 (38.0%)<br>HOMO-3 → LUMO+7 (24.7%)                                                   | (M+X)LCT + (M+I)MCT |
| 3.78 | 328.2 | 0.0146 | HOMO-6 → LUMO (15.3%)<br>HOMO-2 → LUMO+3 (16.8%)<br>HOMO-2 → LUMO+6 (14.1%)                          | (M+X)LCT + (M+I)MCT |
| 3.84 | 322.8 | 0.0042 | HOMO-7 → LUMO+1 (71.6%)                                                                              | (M+X)LCT            |
| 4.00 | 309.6 | 0.0053 | HOMO-3 → LUMO+5 (67.0%)                                                                              | (M+X)LCT            |
| 4.02 | 308.6 | 0.0081 | HOMO-1 → LUMO+11 (21.9%)<br>HOMO → LUMO+12 (48.8%)                                                   | (M+X)LCT            |
| 4.03 | 307.6 | 0.0046 | HOMO-4 → LUMO+4 (51.7%)                                                                              | (M+X)LCT            |
| 4.05 | 306.3 | 0.0053 | HOMO-4 → LUMO+3 (24.8%)<br>HOMO-4 → LUMO+4 (23.5%)<br>HOMO-4 → LUMO+6 (30.0%)                        | (M+X)LCT            |
| 4.05 | 305.9 | 0.0192 | HOMO-6 → LUMO+7 (19.5%)<br>HOMO-4 → LUMO+3 (16.2%)                                                   | (M+X)LCT + (M+I)MCT |
| 4.07 | 304.5 | 0.0047 | HOMO-1 → LUMO+12 (87.5%)                                                                             | (M+X)LCT            |

(a) Oscillator strength;

(b) (M+X)LCT and (M+I)MCT denoted to the transitions of (copper+iodine)-to-ligand charge transfer and (copper+iodine)-to-copper charge transfer nature, respectively.

#### §4. Photophysical measurements

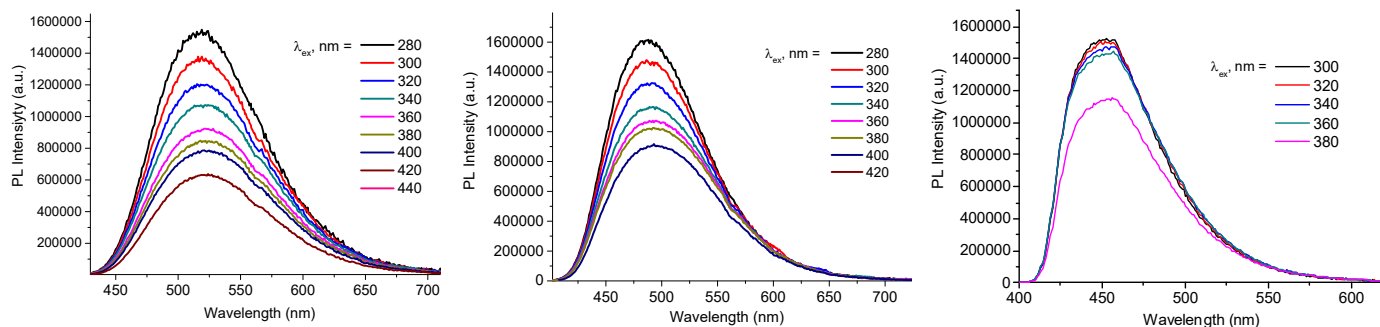

Figure S5. The emission spectra of **1–3** recorded at different excitations (300 K).

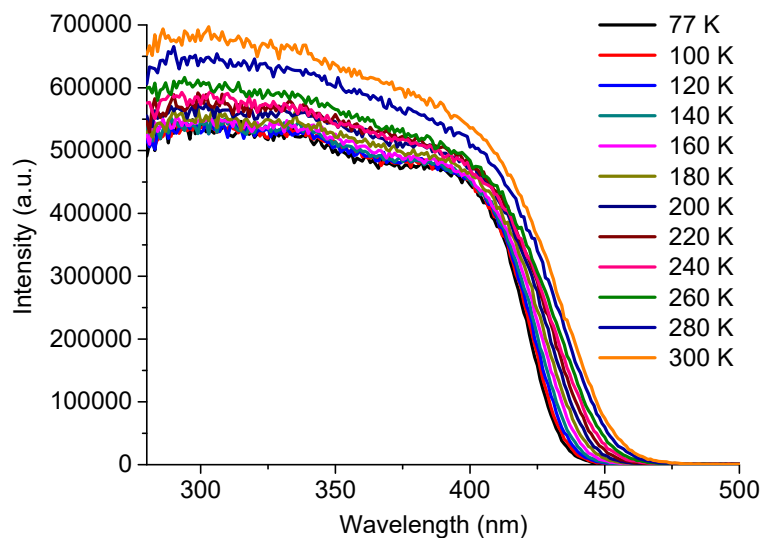

**Figure S6.** Temperature-dependent excitation spectra of **1** ( $\lambda_{em} = 520$  nm).

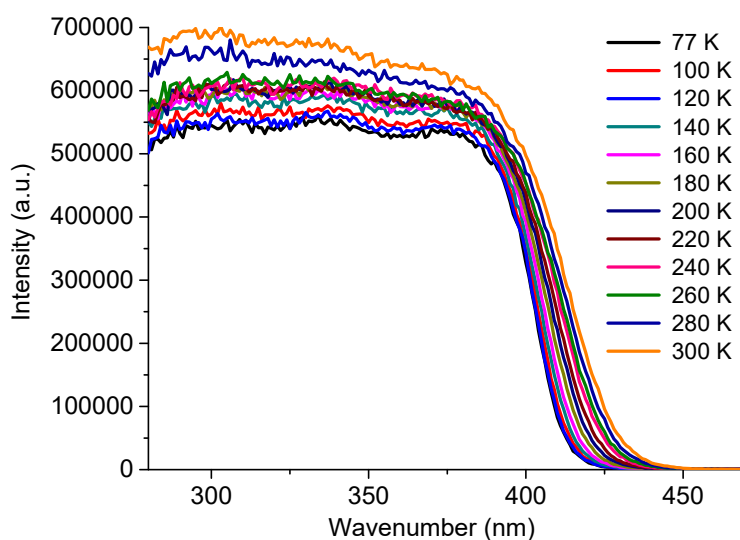

**Figure S7.** Temperature-dependent excitation spectra of **2** ( $\lambda_{em} = 490$  nm).

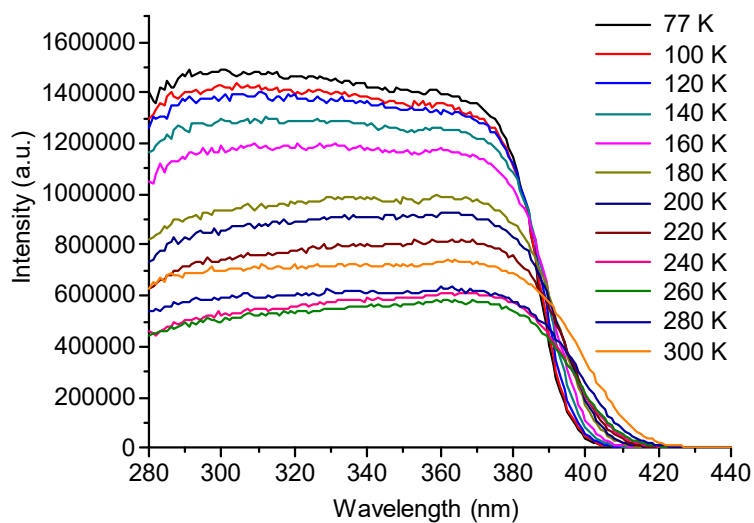

**Figure S8.** Temperature-dependent excitation spectra of **3** ( $\lambda_{em} = 450$  nm).
